# Supplementary material
Source: Springer Nature journal article supplement (https://www.springermedizin.de/resource/supplementary/12967_2009_376_MOESM7_ESM.pdf/9576346)

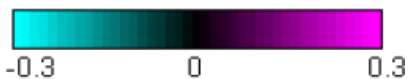

FFPET vs UHR (Top)

FFPET vs Self-reference (Bottom)

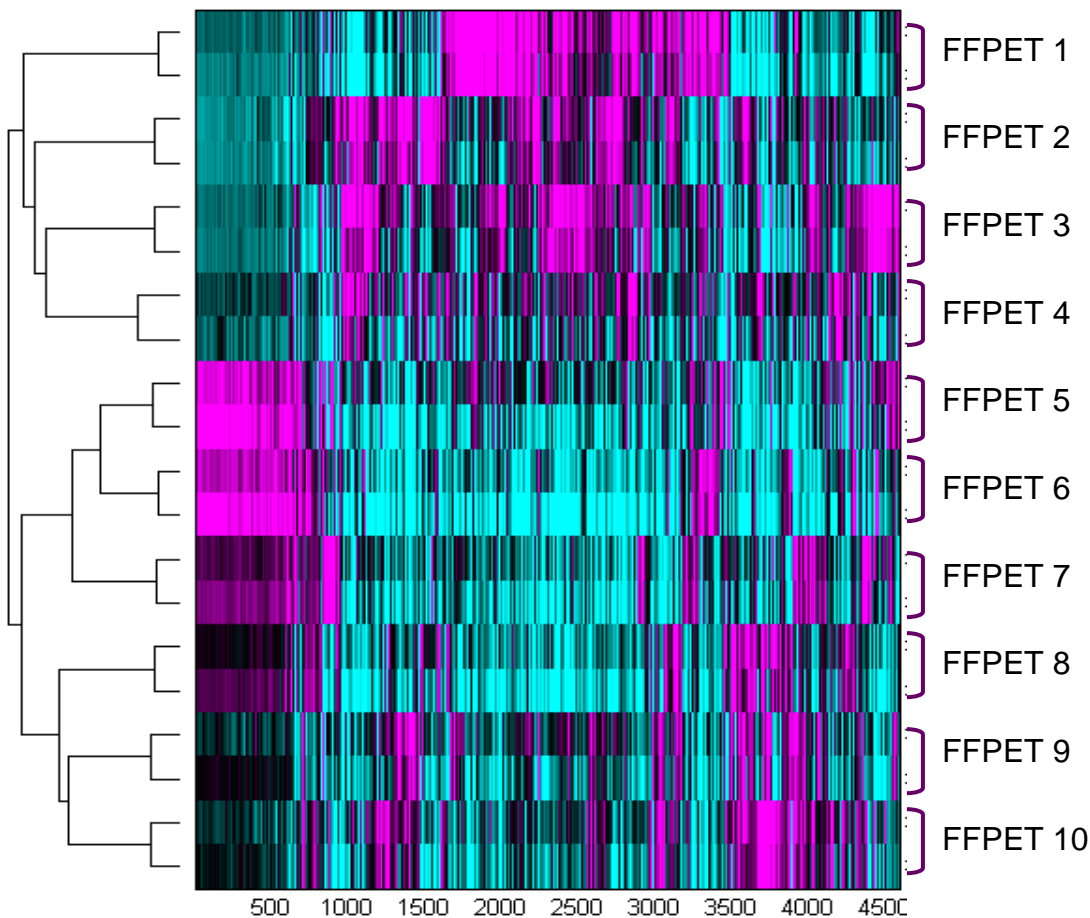

500    1000    1500    2000    2500    3000    3500    4000    4500

Signatures

Supplement: MOESM7 [file 9576346]
